# Supplementary material
Source: HighWire-hosted journal article supplement (https://sti.bmj.com/content/94/5/377)
Supplement: inline-supplementary-material-1 [file inline-supplementary-material-1.docx]

## SUPPLEMENTARY MATERIAL

**Coding Algorithm**

All STI testing service activity

Exclude any testing activity which cannot be carried out online: T5, T6, T7, T10, TS

Exclude testing accompanied by vaccination: P2A P2B P2C W1 W2 W3

Exclude testing accompanied by cytology: P4

Exclude testing accompanied by contraception: P3

Exclude testing accompanied by prisoner code Z

Include the remaining testing codes

P1A, T1, T2, T4, T3, T7, TT

Which may be accompanied by: D3, P1B, P1C, P3, SW, SRH, T9 PN

We defined the outcome of service access as any coding for basic STI testing or diagnosis in either service. This included any service activity where Sexual Health & HIV Activity Property Type Codes (SHHAPT) codes existed for any STI test for HIV, syphilis, chlamydia or gonorrhoea or a combination of the four tests (P1A, T1, T2, T4, T3, T7, TT). Because in clinics STI testing codes are often accompanied by coding for advice and health promotion, we included any testing or diagnostic activity which included these codes (D3, P1B, P1C, P3, SW, SRH, T9). We excluded any service use with any other service activity including coding for any other STI testing (T5, T6, T7, T10, TS). The coding algorithm developed with input from external local clinicians and academics.
